# Supplementary material
Source: PubMed Central journal article supplement (PMC8341441)
Supplement: NIHMS1721452-supplement-supinfo.pdf [file NIHMS1721452-supplement-supinfo.pdf]

**Supplemental Table 1: Criteria for scoring the Healthy Eating Index-2015, Alternate Healthy Eating Index-2010, and Mediterranean Diet Score**

|                                           | Healthy Eating Index-2015 |                                |                                         | Alternate Healthy Eating Index-2010 |                                        |                                              | Mediterranean Diet Score |                            |                                         |
|-------------------------------------------|---------------------------|--------------------------------|-----------------------------------------|-------------------------------------|----------------------------------------|----------------------------------------------|--------------------------|----------------------------|-----------------------------------------|
|                                           | Max Score                 | Criteria for Minimum Score     | Criteria for Maximum Score <sup>a</sup> | Max Score                           | Criteria for Minimum Score             | Criteria for Maximum Score <sup>b</sup>      | Max Score                | Criteria for Minimum Score | Criteria for Maximum Score <sup>c</sup> |
| Total fruits                              | 5                         | 0                              | ≥0.8 C equiv                            | -                                   | -                                      | -                                            | 5                        | 0                          | >22 servings                            |
| Whole fruit                               | 5                         | 0                              | ≥0.4 C equiv                            | 10                                  | 0                                      | ≥4 servings                                  | -                        | -                          | -                                       |
| Total vegetables                          | 5                         | 0                              | ≥1.1 C equiv                            | 10                                  | 0                                      | ≥5 servings                                  | 5                        | 0                          | >33 servings                            |
| Greens and beans                          | 5                         | 0                              | ≥0.2 C equiv                            | -                                   | -                                      | -                                            | -                        | -                          | -                                       |
| Potatoes                                  | -                         | -                              | -                                       | -                                   | -                                      | -                                            | 5                        | 0                          | >18 servings                            |
| Whole grains                              | 10                        | 0                              | ≥1.5 oz equiv                           | 10                                  | 0                                      | ≥90 g for M<br>≥75 g for W                   | 5                        | 0                          | >32 servings                            |
| Dairy                                     | 10                        | 0                              | ≥1.3 C equiv                            | -                                   | -                                      | -                                            | 5                        | >30 servings               | ≤10 servings                            |
| Total protein foods                       | 5                         | 0                              | ≥2.5 oz equiv                           | -                                   | -                                      | -                                            | -                        | -                          | -                                       |
| Poultry                                   | -                         | -                              | -                                       | -                                   | -                                      | -                                            | 5                        | ≤3 servings                | >10 servings                            |
| Seafood/plant proteins                    | 5                         | 0                              | ≥0.8 oz equiv                           | -                                   | -                                      | -                                            | -                        | -                          | -                                       |
| Fish                                      | -                         | -                              | -                                       | -                                   | -                                      | -                                            | 5                        | 0                          | >6 servings                             |
| Red and processed meat                    | -                         | -                              | -                                       | 10                                  | ≥1.5 serving                           | 0                                            | 5                        | >10 servings               | ≤1 serving                              |
| Nuts and legumes                          | -                         | -                              | -                                       | 10                                  | 0                                      | ≥1 serving                                   | 5                        | 0                          | >6 servings                             |
| Fatty acids                               | 10                        | (PUFAs + MUFAs) / SFAs<br>≤1.2 | (PUFAs + MUFAs) / SFAs<br>≥2.5          | 10                                  | ≤2% energy from PUFAs                  | ≥10% energy from PUFAs                       | 5                        | MUFA/SFA<br><0.1           | MUFA/SFA<br>≥2.0                        |
| Trans fat                                 | -                         | -                              | -                                       | 10                                  | ≥4% energy                             | ≤0.5% energy                                 | -                        | -                          | -                                       |
| Long-chain (n-3) fats                     | -                         | -                              | -                                       | 10                                  | 0                                      | ≥250 mg                                      | -                        | -                          | -                                       |
| Refined grains                            | 10                        | ≥4.3 oz equiv                  | ≤1.8 oz equiv                           | -                                   | -                                      | -                                            | -                        | -                          | -                                       |
| Sodium                                    | 10                        | ≥2.0 g                         | ≤1.1 g                                  | 10                                  | Highest decile                         | Lowest decile                                | -                        | -                          | -                                       |
| Added sugars                              | 10                        | ≥26% energy                    | ≤6.5% energy                            | -                                   | -                                      | -                                            | -                        | -                          | -                                       |
| Sugar-sweetened beverages and fruit juice | -                         | -                              | -                                       | 10                                  | ≥1 serving                             | 0                                            | -                        | -                          | -                                       |
| Saturated fats                            | 10                        | ≥16% energy                    | ≤8% energy                              | -                                   | -                                      | -                                            | -                        | -                          | -                                       |
| Alcohol                                   | -                         | -                              | -                                       | 10                                  | ≥3.5 drinks for M<br>≥2.5 drinks for W | 0.5-2.0 drinks for M<br>0.5-1.5 drinks for W | 5                        | >700 mL or 0               | <300 mL                                 |
| <b>Total score</b>                        | <b>100</b>                |                                |                                         | <b>110</b>                          |                                        |                                              | <b>55</b>                |                            |                                         |

C, cup; equiv, equivalents; g, grams; M, men; mg, milligrams; MUFAs, monounsaturated fatty acids; Oz, ounce; PUFAs, polyunsaturated fatty acids; SFA, saturated fatty acids; W, women

<sup>a</sup> Criteria based on daily intake per 1,000 kcal

<sup>b</sup> Criteria based on daily intake per 1,000 kcal

<sup>c</sup> Criteria based on weekly intake

**Supplemental Table 2: Full statistical results from multivariate-adjusted linear regression models for the Healthy Eating Index-2015, Alternate Healthy Eating Index-2010, and the Mediterranean Diet Score**

|                                    | HEI-2015 score |              | HEI-2015 score + chronic medical conditions |              | AHEI-2010 score |              | AHEI-2010 score + chronic medical conditions |              | MedDiet score |              | MedDiet score + chronic medical conditions |              |
|------------------------------------|----------------|--------------|---------------------------------------------|--------------|-----------------|--------------|----------------------------------------------|--------------|---------------|--------------|--------------------------------------------|--------------|
|                                    | $\beta$        | 95% CI       | $\beta$                                     | 95% CI       | $\beta$         | 95% CI       | $\beta$                                      | 95% CI       | $\beta$       | 95% CI       | $\beta$                                    | 95% CI       |
| Intercept                          | 49.0           | 46.1, 51.9   | 49.1                                        | 46.1, 52.0   | 40.1            | 37.1, 43.1   | 39.8                                         | 36.7, 42.9   | 18.3          | 17.2, 19.3   | 18.1                                       | 17.0, 19.1   |
| Age categories                     |                |              |                                             |              |                 |              |                                              |              |               |              |                                            |              |
| 60-64                              | -2.95          | -4.66, -1.23 | -2.95                                       | -4.71, -1.20 | -1.78           | -3.21, -0.35 | -1.67                                        | -3.15, -0.19 | -1.09         | -1.57, -0.61 | -1.03                                      | -1.53, -0.53 |
| 65-69                              | -0.97          | -3.04, 1.09  | -0.97                                       | -3.04, 1.11  | -0.57           | -2.14, 1.00  | -0.50                                        | -2.08, 1.08  | -0.58         | -1.19, 0.03  | -0.54                                      | -1.18, 0.10  |
| 70-74                              | -0.64          | -2.23, 0.96  | -0.65                                       | -2.24, 0.94  | 0.21            | -1.19, 1.61  | 0.22                                         | -1.17, 1.62  | -0.34         | -0.94, 0.27  | -0.32                                      | -0.92, 0.29  |
| 75-79                              | -1.38          | -3.15, 0.40  | -1.37                                       | -3.13, 0.40  | -0.76           | -2.44, 0.92  | -0.72                                        | -2.39, 0.95  | -0.18         | -0.83, 0.47  | -0.16                                      | -0.82, 0.49  |
| ≥80                                | Ref.           | -            | Ref.                                        | -            | Ref.            | -            | Ref.                                         | -            | Ref.          | -            | Ref.                                       | -            |
| Sex                                |                |              |                                             |              |                 |              |                                              |              |               |              |                                            |              |
| Male                               | Ref.           | -            | Ref.                                        | -            | Ref.            | -            | Ref.                                         | -            | Ref.          | -            | Ref.                                       | -            |
| Female                             | 2.83           | 1.79, 3.87   | 2.84                                        | 1.80, 3.88   | 1.42            | 0.44, 2.39   | 1.40                                         | 0.43, 2.37   | 1.32          | 0.94, 1.69   | 1.32                                       | 0.95, 1.69   |
| Race/ethnicity                     |                |              |                                             |              |                 |              |                                              |              |               |              |                                            |              |
| Non-Hispanic White                 | Ref.           | -            | Ref.                                        | -            | Ref.            | -            | Ref.                                         | -            | Ref.          | -            | Ref.                                       | -            |
| Non-Hispanic Black                 | -0.22          | -1.49, 1.04  | -0.22                                       | -1.49, 1.05  | -2.21           | -3.27, -1.15 | -2.20                                        | -3.25, -1.15 | -0.23         | -0.65, 0.18  | -0.21                                      | -0.63, 0.21  |
| Hispanic                           | 3.94           | 2.71, 5.18   | 3.95                                        | 2.70, 5.21   | 2.18            | 1.08, 3.28   | 2.19                                         | 1.10, 3.28   | 1.51          | 1.17, 1.85   | 1.53                                       | 1.19, 1.87   |
| Other                              | 4.01           | 1.81, 6.22   | 4.00                                        | 1.79, 6.20   | 4.64            | 2.50, 6.79   | 4.66                                         | 2.52, 6.80   | 2.06          | 1.23, 2.90   | 2.05                                       | 1.22, 2.88   |
| Education                          |                |              |                                             |              |                 |              |                                              |              |               |              |                                            |              |
| <12 years                          | Ref.           | -            | Ref.                                        | -            | Ref.            | -            | Ref.                                         | -            | Ref.          | -            | Ref.                                       | -            |
| High school graduate or equivalent | 0.70           | -0.52, 1.91  | 0.68                                        | -0.54, 1.90  | 0.70            | -0.17, 1.57  | 0.72                                         | -0.14, 1.59  | 0.12          | -0.25, 0.49  | 0.13                                       | -0.23, 0.50  |
| Some college                       | 2.50           | 1.17, 3.83   | 2.49                                        | 1.18, 3.81   | 2.64            | 1.55, 3.74   | 2.63                                         | 1.54, 3.72   | 0.80          | 0.29, 1.31   | 0.81                                       | 0.30, 1.31   |
| College graduate                   | 5.01           | 2.99, 7.02   | 5.03                                        | 3.02, 7.04   | 5.11            | 3.48, 6.75   | 5.13                                         | 3.51, 6.76   | 1.39          | 0.80, 1.98   | 1.41                                       | 0.83, 1.99   |
| Poverty income ratio               |                |              |                                             |              |                 |              |                                              |              |               |              |                                            |              |
| ≤130% FPL                          | Ref.           | -            | Ref.                                        | -            | Ref.            | -            | Ref.                                         | -            | Ref.          | -            | Ref.                                       | -            |
| 131-300% FPL                       | -0.11          | -1.15, 0.94  | -0.10                                       | -1.15, 0.94  | 0.87            | -0.10, 1.84  | 0.87                                         | -0.10, 1.84  | 0.09          | -0.25, 0.43  | 0.09                                       | -0.24, 0.43  |
| Missing                            | 0.89           | -0.96, 2.74  | 0.90                                        | -0.95, 2.75  | 2.29            | 0.84, 3.73   | 2.29                                         | 0.85, 3.74   | 0.15          | -0.40, 0.70  | 0.15                                       | -0.40, 0.70  |
| Marital status                     |                |              |                                             |              |                 |              |                                              |              |               |              |                                            |              |
| Married or living with partner     | Ref.           | -            | Ref.                                        | -            | Ref.            | -            | Ref.                                         | -            | Ref.          | -            | Ref.                                       | -            |
| Never married                      | 0.00           | -2.46, 2.47  | 0.01                                        | -2.47, 2.49  | 0.86            | -1.55, 3.28  | 0.84                                         | -1.58, 3.26  | -0.72         | -1.59, 0.16  | -0.72                                      | -1.60, 0.16  |
| Separated, divorced, widowed       | 0.28           | -0.87, 1.43  | 0.29                                        | -0.85, 1.42  | -0.33           | -1.39, 0.74  | -0.32                                        | -1.38, 0.75  | -0.15         | -0.58, 0.27  | -0.16                                      | -0.58, 0.27  |

|                                        |       |               |       |               |       |               |       |               |       |              |       |              |  |
|----------------------------------------|-------|---------------|-------|---------------|-------|---------------|-------|---------------|-------|--------------|-------|--------------|--|
| Smoking status                         |       |               |       |               |       |               |       |               |       |              |       |              |  |
| Never smoker                           | Ref.  | -             | Ref.  | -             | Ref.  | -             | Ref.  | -             | Ref.  | -            | Ref.  | -            |  |
| Former smoker                          | -0.97 | -2.16, 0.22   | -0.99 | -2.18, 0.21   | 0.15  | -0.97, 1.27   | 0.12  | -1.01, 1.26   | -0.26 | -0.66, 0.13  | -0.29 | -0.68, 0.11  |  |
| Current smoker                         | -5.63 | -7.28, -3.97  | -5.67 | -7.37, -3.96  | -4.07 | -5.39, -2.75  | -4.10 | -5.44, -2.76  | -1.57 | -2.10, -1.04 | -1.61 | -2.16, -1.06 |  |
| Moderate or vigorous physical activity | 4.91  | 3.67, 6.14    | 4.88  | 3.64, 6.13    | 3.55  | 2.54, 4.57    | 3.55  | 2.53, 4.56    | 1.28  | 0.90, 1.66   | 1.30  | 0.93, 1.68   |  |
| Survey year                            |       |               |       |               |       |               |       |               |       |              |       |              |  |
| 2007-2008                              | 2.64  | 0.76, 4.52    | 2.63  | 0.76, 4.51    | 1.51  | 0.03, 2.98    | 1.53  | 0.05, 3.01    | 1.23  | 0.69, 1.76   | 1.23  | 0.70, 1.76   |  |
| 2009-2010                              | 2.15  | 0.33, 3.96    | 2.13  | 0.30, 3.96    | 0.73  | -0.61, 2.08   | 0.73  | -0.62, 2.08   | 0.88  | 0.32, 1.44   | 0.89  | 0.33, 1.45   |  |
| 2011-2012                              | 3.41  | 1.09, 5.73    | 3.41  | 1.09, 5.73    | 2.14  | 0.74, 3.54    | 2.14  | 0.73, 3.55    | 1.28  | 0.61, 1.94   | 1.27  | 0.60, 1.93   |  |
| 2013-2014                              | 1.67  | -0.20, 3.54   | 1.66  | -0.18, 3.51   | 0.81  | -0.59, 2.21   | 0.80  | -0.60, 2.20   | 0.64  | 0.11, 1.18   | 0.65  | 0.11, 1.18   |  |
| 2015-2016                              | Ref.  | -             | Ref.  | -             | Ref.  | -             | Ref.  | -             | Ref.  | -            | Ref.  | -            |  |
| Total energy intake (average)          | 0.00  | -0.001, 0.000 | 0.00  | -0.001, 0.000 | 0.00  | -0.001, 0.000 | 0     | -0.001, 0.000 | 0.001 | 0.001, 0.001 | 0.001 | 0.001, 0.001 |  |
| Household food security status         |       |               |       |               |       |               |       |               |       |              |       |              |  |
| Food secure                            | Ref.  | -             | Ref.  | -             | Ref.  | -             | Ref.  | -             | Ref.  | -            | Ref.  | -            |  |
| Marginal food secure                   | -1.43 | -3.18, 0.33   | -1.42 | -3.19, 0.35   | -2.42 | -3.76, -1.07  | -2.41 | -3.77, -1.04  | -0.62 | -1.11, -0.12 | -0.63 | -1.12, -0.14 |  |
| Food insecure                          | -1.90 | -3.70, -0.09  | -1.91 | -3.72, -0.10  | -1.47 | -2.51, -0.44  | -1.49 | -2.53, -0.45  | -0.54 | -1.06, -0.01 | -0.55 | -1.09, -0.02 |  |
| Chronic medical conditions             |       |               |       |               |       |               |       |               |       |              |       |              |  |
| 0 conditions                           | -     | -             | Ref.  | -             | -     | -             | Ref.  | -             | -     | -            | Ref.  | -            |  |
| 1 condition                            | -     | -             | -0.15 | -1.54, 1.24   | -     | -             | 0.46  | -0.57, 1.49   | -     | -            | 0.25  | -0.11, 0.61  |  |
| 2 conditions                           | -     | -             | -0.59 | -2.04, 0.87   | -     | -             | 0.27  | -1.05, 1.59   | -     | -            | 0.20  | -0.22, 0.61  |  |
| 3 conditions                           | -     | -             | 0.87  | -0.78, 2.51   | -     | -             | 0.86  | -0.57, 2.29   | -     | -            | 0.16  | -0.34, 0.66  |  |
| 4 or more conditions                   | -     | -             | -0.02 | -2.12, 2.08   | -     | -             | -0.17 | -2.02, 1.67   | -     | -            | 0.47  | -0.31, 1.24  |  |

**Supplemental Table 3: Full statistical results from multivariate-adjusted logistic regression models comparing individuals in the top quintile to the bottom four quintiles of Healthy Eating Index-2015, Alternate Healthy Eating Index-2010, and the Mediterranean Diet Score**

|                                    | HEI-2015 score |            | HEI-2015 score + chronic medical conditions |            | AHEI-2010 score |            | AHEI-2010 score + chronic medical conditions |            | MedDiet score |            | MedDiet score + chronic medical conditions |            |
|------------------------------------|----------------|------------|---------------------------------------------|------------|-----------------|------------|----------------------------------------------|------------|---------------|------------|--------------------------------------------|------------|
|                                    | OR             | 95% CI     | OR                                          | 95% CI     | OR              | 95% CI     | OR                                           | 95% CI     | OR            | 95% CI     | OR                                         | 95% CI     |
| Age categories                     |                |            |                                             |            |                 |            |                                              |            |               |            |                                            |            |
| 60-64                              | 0.66           | 0.46, 0.94 | 0.66                                        | 0.46, 0.94 | 0.73            | 0.49, 1.09 | 0.73                                         | 0.49, 1.08 | 0.66          | 0.48, 0.91 | 0.67                                       | 0.48, 0.94 |
| 65-69                              | 1.08           | 0.75, 1.56 | 1.07                                        | 0.74, 1.54 | 0.90            | 0.58, 1.39 | 0.90                                         | 0.58, 1.38 | 0.97          | 0.69, 1.37 | 0.99                                       | 0.69, 1.41 |
| 70-74                              | 1.04           | 0.73, 1.49 | 1.04                                        | 0.73, 1.48 | 0.99            | 0.71, 1.38 | 0.99                                         | 0.71, 1.38 | 1.14          | 0.86, 1.53 | 1.16                                       | 0.86, 1.55 |
| 75-79                              | 0.78           | 0.53, 1.15 | 0.78                                        | 0.53, 1.14 | 0.88            | 0.61, 1.26 | 0.88                                         | 0.62, 1.26 | 0.94          | 0.64, 1.39 | 0.95                                       | 0.65, 1.41 |
| ≥80                                | Ref.           | -          | Ref.                                        | -          | Ref.            | -          | Ref.                                         | -          | Ref.          | -          | Ref.                                       | -          |
| Sex                                |                |            |                                             |            |                 |            |                                              |            |               |            |                                            |            |
| Male                               | Ref.           | -          | Ref.                                        | -          | Ref.            | -          | Ref.                                         | -          | Ref.          | -          | Ref.                                       | -          |
| Female                             | 1.65           | 1.29, 2.11 | 1.64                                        | 1.28, 2.10 | 1.48            | 1.16, 1.89 | 1.49                                         | 1.16, 1.91 | 1.45          | 1.15, 1.83 | 1.47                                       | 1.17, 1.84 |
| Race/ethnicity                     |                |            |                                             |            |                 |            |                                              |            |               |            |                                            |            |
| Non-Hispanic White                 | Ref.           | -          | Ref.                                        | -          | Ref.            | -          | Ref.                                         | -          | Ref.          | -          | Ref.                                       | -          |
| Non-Hispanic Black                 | 0.98           | 0.74, 1.29 | 0.98                                        | 0.74, 1.29 | 0.67            | 0.49, 0.92 | 0.67                                         | 0.49, 0.91 | 1.02          | 0.76, 1.36 | 1.02                                       | 0.76, 1.38 |
| Hispanic                           | 1.97           | 1.50, 2.60 | 1.97                                        | 1.49, 2.60 | 1.48            | 1.16, 1.90 | 1.49                                         | 1.17, 1.91 | 1.87          | 1.52, 2.29 | 1.88                                       | 1.53, 2.31 |
| Other                              | 2.16           | 1.37, 3.41 | 2.16                                        | 1.36, 3.41 | 2.52            | 1.57, 4.05 | 2.51                                         | 1.57, 4.02 | 2.67          | 1.81, 3.94 | 2.67                                       | 1.81, 3.93 |
| Education                          |                |            |                                             |            |                 |            |                                              |            |               |            |                                            |            |
| <12 years                          | Ref.           | -          | Ref.                                        | -          | Ref.            | -          | Ref.                                         | -          | Ref.          | -          | Ref.                                       | -          |
| High school graduate or equivalent | 1.18           | 0.91, 1.52 | 1.18                                        | 0.91, 1.53 | 1.18            | 0.92, 1.52 | 1.17                                         | 0.92, 1.50 | 0.83          | 0.64, 1.09 | 0.83                                       | 0.63, 1.09 |
| Some college                       | 1.66           | 1.30, 2.12 | 1.67                                        | 1.31, 2.13 | 1.83            | 1.38, 2.43 | 1.83                                         | 1.39, 2.43 | 1.48          | 1.12, 1.95 | 1.47                                       | 1.12, 1.95 |
| College graduate                   | 2.70           | 1.85, 3.93 | 2.71                                        | 1.86, 3.96 | 2.51            | 1.85, 3.41 | 2.54                                         | 1.88, 3.43 | 1.76          | 1.31, 2.37 | 1.76                                       | 1.31, 2.37 |
| Poverty income ratio               |                |            |                                             |            |                 |            |                                              |            |               |            |                                            |            |
| ≤130% FPL                          | Ref.           | -          | Ref.                                        | -          | Ref.            | -          | Ref.                                         | -          | Ref.          | -          | Ref.                                       | -          |
| 131-300% FPL                       | 1.01           | 0.80, 1.27 | 1.01                                        | 0.80, 1.28 | 0.91            | 0.70, 1.18 | 0.91                                         | 0.70, 1.18 | 0.93          | 0.72, 1.20 | 0.93                                       | 0.72, 1.20 |
| Missing                            | 1.06           | 0.76, 1.48 | 1.06                                        | 0.76, 1.47 | 1.06            | 0.78, 1.44 | 1.07                                         | 0.79, 1.45 | 0.97          | 0.70, 1.35 | 0.97                                       | 0.70, 1.35 |
| Marital status                     |                |            |                                             |            |                 |            |                                              |            |               |            |                                            |            |
| Married or living with partner     | Ref.           | -          | Ref.                                        | -          | Ref.            | -          | Ref.                                         | -          | Ref.          | -          | Ref.                                       | -          |
| Never married                      | 1.42           | 0.87, 2.33 | 1.43                                        | 0.88, 2.34 | 1.37            | 0.82, 2.28 | 1.37                                         | 0.83, 2.27 | 0.86          | 0.53, 1.39 | 0.86                                       | 0.53, 1.39 |
| Separated, divorced, widowed       | 1.14           | 0.89, 1.48 | 1.14                                        | 0.89, 1.48 | 0.81            | 0.60, 1.11 | 0.81                                         | 0.60, 1.10 | 0.90          | 0.69, 1.17 | 0.89                                       | 0.68, 1.17 |
| Smoking status                     |                |            |                                             |            |                 |            |                                              |            |               |            |                                            |            |
| Never smoker                       | Ref.           | -          | Ref.                                        | -          | Ref.            | -          | Ref.                                         | -          | Ref.          | -          | Ref.                                       | -          |
| Former smoker                      | 0.91           | 0.70, 1.20 | 0.92                                        | 0.70, 1.20 | 1.02            | 0.81, 1.28 | 1.01                                         | 0.80, 1.28 | 1.03          | 0.80, 1.32 | 1.01                                       | 0.78, 1.31 |
| Current smoker                     | 0.35           | 0.24, 0.51 | 0.35                                        | 0.24, 0.52 | 0.44            | 0.28, 0.70 | 0.44                                         | 0.28, 0.69 | 0.43          | 0.28, 0.66 | 0.42                                       | 0.27, 0.65 |

|                                        |      |            |      |            |      |            |      |            |      |            |      |            |
|----------------------------------------|------|------------|------|------------|------|------------|------|------------|------|------------|------|------------|
| Moderate or vigorous physical activity | 2.05 | 1.64, 2.56 | 2.04 | 1.63, 2.57 | 1.78 | 1.41, 2.24 | 1.78 | 1.41, 2.26 | 1.82 | 1.41, 2.34 | 1.84 | 1.43, 2.37 |
| Survey year                            |      |            |      |            |      |            |      |            |      |            |      |            |
| 2007-2008                              | 1.63 | 1.06, 2.50 | 1.63 | 1.06, 2.50 | 1.46 | 0.95, 2.25 | 1.46 | 0.95, 2.24 | 1.91 | 1.37, 2.66 | 1.91 | 1.37, 2.67 |
| 2009-2010                              | 1.44 | 0.97, 2.15 | 1.45 | 0.97, 2.15 | 1.38 | 0.92, 2.07 | 1.38 | 0.92, 2.06 | 1.25 | 0.92, 1.71 | 1.26 | 0.92, 1.72 |
| 2011-2012                              | 1.51 | 0.94, 2.41 | 1.51 | 0.95, 2.42 | 1.37 | 0.90, 2.10 | 1.37 | 0.90, 2.09 | 1.54 | 1.04, 2.29 | 1.54 | 1.04, 2.28 |
| 2013-2014                              | 1.38 | 0.90, 2.10 | 1.40 | 0.92, 2.12 | 1.24 | 0.86, 1.78 | 1.24 | 0.87, 1.77 | 1.13 | 0.81, 1.59 | 1.12 | 0.79, 1.58 |
| 2015-2016                              | Ref. | -          |
| Total energy intake (average)          | 1.00 | 1.00, 1.00 | 1.00 | 1.00, 1.00 | 1.00 | 1.00, 1.00 | 1.00 | 1.00, 1.00 | 1.00 | 1.00, 1.00 | 1.00 | 1.00, 1.00 |
| Household food security status         |      |            |      |            |      |            |      |            |      |            |      |            |
| Food secure                            | Ref. | -          |
| Marginal food secure                   | 0.96 | 0.67, 1.38 | 0.96 | 0.67, 1.38 | 0.58 | 0.41, 0.83 | 0.58 | 0.41, 0.83 | 0.69 | 0.48, 0.99 | 0.69 | 0.48, 0.99 |
| Food insecure                          | 0.67 | 0.47, 0.96 | 0.68 | 0.47, 0.98 | 0.58 | 0.43, 0.77 | 0.57 | 0.43, 0.76 | 0.96 | 0.65, 1.42 | 0.94 | 0.64, 1.40 |
| Chronic medical conditions             |      |            |      |            |      |            |      |            |      |            |      |            |
| 0 conditions                           | -    | -          | Ref. | -          | -    | -          | Ref. | -          | -    | -          | Ref. | -          |
| 1 condition                            | -    | -          | 1.11 | 0.85, 1.46 | -    | -          | 0.94 | 0.73, 1.22 | -    | -          | 0.99 | 0.79, 1.25 |
| 2 conditions                           | -    | -          | 0.98 | 0.70, 1.36 | -    | -          | 0.85 | 0.59, 1.21 | -    | -          | 1.15 | 0.86, 1.54 |
| 3 conditions                           | -    | -          | 0.87 | 0.60, 1.26 | -    | -          | 1.15 | 0.81, 1.62 | -    | -          | 1.11 | 0.76, 1.63 |
| 4 or more conditions                   | -    | -          | 1.00 | 0.63, 1.59 | -    | -          | 1.14 | 0.72, 1.80 | -    | -          | 1.17 | 0.78, 1.77 |
